# Supplementary material for: Fecal calprotectin and platelet count predict histologic disease activity in pediatric ulcerative colitis: results from a projection-predictive feature selection
Source: Springer Nature journal article supplement (doi:10.1007/s00431-024-05554-y), 2024-05-06
Supplement: MOESM1 [file 27060822]

## ELECTRONIC SUPPLEMENTARY MATERIAL

for

### „Fecal calprotectin and platelet count predict histologic disease activity in pediatric ulcerative colitis: Results from a projection-predictive feature selection“

Schiller B<sup>1\*</sup>, Wirthgen E<sup>1\*</sup>, Weber F<sup>2</sup>, Schiller S<sup>1,3</sup>, Radke M<sup>1</sup>, Claßen M<sup>4</sup>, Däbritz J<sup>1,3</sup>;  
CEDATA-GPGE Study Group

#### Affiliations

<sup>1</sup>Department of Pediatrics, Rostock University Medical Center, Rostock, Germany;

<sup>2</sup>Institute for Biostatistics and Informatics in Medicine and Ageing Research, Rostock University Medical Center, Rostock, Germany;

<sup>3</sup>Department of Pediatrics, Greifswald University Medical Center, Greifswald, Germany

<sup>4</sup>Department of Pediatrics and Adolescent Medicine, Erlangen University Medical Center, Erlangen, Germany

\*These authors contributed equally to this work.

#### Corresponding author

Prof. Dr. Jan Däbritz, M.D.

Greifswald University Medical Center

Department of Pediatrics

Ferdinand-Sauerbruch-Str.1

D-17457 Greifswald

GERMANY

Tel.: +49 (0)3834 86-6301

Fax: +49 (0)3834 86-6410

E-Mail: Jan.Daebritz@med.uni-greifswald.de

## INDEX OF THE ELECTRONIC SUPPLEMENTARY MATERIAL

|                                                     |           |
|-----------------------------------------------------|-----------|
| <b>SUPPLEMENTARY TABLES.....</b>                    | <b>3</b>  |
| <b>Supplementary Table S1.....</b>                  | <b>3</b>  |
| <b>Supplementary Table S2.....</b>                  | <b>4</b>  |
| <b>Supplementary Table S3.....</b>                  | <b>5</b>  |
| <b>Supplementary Table S4.....</b>                  | <b>6</b>  |
| <b>SUPPLEMENTARY FIGURES .....</b>                  | <b>7</b>  |
| <b>Supplementary Figure S1 .....</b>                | <b>7</b>  |
| <b>Supplementary Figure S2 .....</b>                | <b>8</b>  |
| <b>Supplementary Figure S3 .....</b>                | <b>9</b>  |
| <b>SUPPLEMENTARY DISCUSSION.....</b>                | <b>10</b> |
| <b>Limits of detection .....</b>                    | <b>10</b> |
| <b>Overfitting in post-selection inference.....</b> | <b>10</b> |
| <b>Augmented-data and latent projection.....</b>    | <b>10</b> |
| <b>Coarsening of categorical predictors.....</b>    | <b>10</b> |
| <b>Prior sensitivity analysis .....</b>             | <b>10</b> |
| <b>SUPPLEMENTARY REFERENCES .....</b>               | <b>11</b> |

## SUPPLEMENTARY TABLES

**Supplementary Table S1.** Overview of the candidate predictors for the statistical model.

| <b>Demographic information</b>                    |                         |                               |                                       |                 |                             |
|---------------------------------------------------|-------------------------|-------------------------------|---------------------------------------|-----------------|-----------------------------|
| Age                                               | Sex                     | IBD clinic                    | Patient identifier (group-level term) |                 |                             |
| <b>Laboratory findings (blood)</b>                |                         |                               |                                       |                 |                             |
| C-reactive protein                                | Hematocrit              | Hemoglobin                    | Mean corpuscular volume               | Platelet count  | White blood cell count      |
| <b>Laboratory findings (stool)</b>                |                         |                               |                                       |                 |                             |
| Fecal calprotectin                                |                         |                               |                                       |                 |                             |
| <b>Parameters of medical history</b>              |                         |                               |                                       |                 |                             |
| Abdominal pain                                    | Abdominal pain at night | Activity limitation           | General well-being                    | Nocturnal stool | Stool quantity per 24 hours |
| Stool blood                                       | Stool consistency       |                               |                                       |                 |                             |
| <b>Physical examination</b>                       |                         |                               |                                       |                 |                             |
| Abdominal finding*<br>Pressure pain<br>Resistance | Body weight gain        | Extraintestinal manifestation | Perianal disease                      |                 |                             |

\* Pressure pain and resistance were analyzed individually and once together in the category abdominal finding (conspicuous if one of the two parameters was pathological in the examination).

**Supplementary Table S2.** Characteristics of the study cohort. Age, body weight, and body height refer to the first visit of each patient.

|                                |                                                                                   |
|--------------------------------|-----------------------------------------------------------------------------------|
| <b>General characteristics</b> | Patients (total: 59)                                                              |
| <b>Male, N (%)</b>             | 24 (40.7)                                                                         |
| <b>Female, N (%)</b>           | 35 (59.3)                                                                         |
| <b>Age, years</b>              | M: 13.1 ( $\pm$ 3.4), Q0: 2.5, Q25: 11.0, Q50: 13.6, Q75: 15.6, Q100: 17.9        |
| <b>Body weight, kg</b>         | M: 48.2 ( $\pm$ 16.5), Q0: 14.7, Q25: 34.7, Q50: 49.0, Q75: 59.1, Q100: 83.0      |
| <b>Body height, cm</b>         | M: 154.9 ( $\pm$ 18.0), Q0: 88.0, Q25: 147.0, Q50: 157.5, Q75: 168.3, Q100: 187.0 |
| <b>Histologic score, N (%)</b> | Visits (total: 91)                                                                |
| <b>Remission</b>               | 5 (5.5)                                                                           |
| <b>Mild</b>                    | 19 (20.9)                                                                         |
| <b>Moderate</b>                | 52 (57.1)                                                                         |
| <b>Severe</b>                  | 15 (16.5)                                                                         |

Age, body weight and body height are presented as mean (M)  $\pm$  standard deviation, minimum (Q0), 1<sup>st</sup> quartile (Q25), median (Q50), 3<sup>rd</sup> quartile (Q75), and maximum (Q100).

**Supplementary Table S3.** Categorical candidate predictors and their distribution across visits.

| <b>Name</b>                                | <b>Description</b>                                                                                                                                |
|--------------------------------------------|---------------------------------------------------------------------------------------------------------------------------------------------------|
| Abdominal pain                             | 53 (58%) "Yes", 37 (41%) "No", 1 (1%) MVs                                                                                                         |
| Abdominal pain at night                    | 6 (7%) "Yes", 84 (92%) "No", 1 (1%) MVs                                                                                                           |
| Abdominal finding                          | 65 (71%) "Without pathological findings", 26 (29%) "With pathological findings"                                                                   |
| Abdominal finding – pressure pain          | 23 (25%) "Yes", 68 (75%) "No"                                                                                                                     |
| Abdominal finding – resistance             | 4 (4%) "Yes", 87 (96%) "No"                                                                                                                       |
| Appetite <sup>1</sup>                      | 52 (57%) "Good", 21 (23%) "Reduced", 5 (5%) "Poor", 13 (14%) MVs                                                                                  |
| Activity limitation                        | 39 (43%) "Yes", 51 (56%) "No", 1 (1%) MVs                                                                                                         |
| Extraintestinal manifestation <sup>2</sup> | 6 (7%) "Yes", 85 (93%) "No"                                                                                                                       |
| General well-being                         | 53 (58%) "Very good, good", 38 (42%) "Reduced, poor, very poor"                                                                                   |
| Height gain <sup>3,5</sup>                 | 83 (91%) "Yes", 6 (7%) "No", 2 (2%) MVs                                                                                                           |
| IBD clinic                                 | 37 (41%) "IBD center A", 54 (59%) "IBD center B"                                                                                                  |
| Nocturnal stool                            | 22 (24%) "Yes", 69 (76%) "No"                                                                                                                     |
| Perianal disease <sup>4</sup>              | 3 (3%) "Yes", 88 (97%) "No"                                                                                                                       |
| Sex                                        | 54 (59%) "Female", 37 (41%) "Male"                                                                                                                |
| Stool blood                                | 58 (64%) "Yes", 33 (36%) "No"                                                                                                                     |
| Stool consistency                          | 23 (25%) "Formed", 68 (75%) "Semi-formed or liquid"                                                                                               |
| Stool quantity                             | 51 (56%) " $\leq$ 3 stools per 24 hours", 40 (44%) " $>$ 3 stools per 24 hours"                                                                   |
| Weight gain <sup>5</sup>                   | 63 (69%) "Weight gain, voluntary stable weight, voluntary weight loss", 26 (29%) "Involuntary stable weight, involuntary weight loss", 2 (2%) MVs |

<sup>1</sup>excluded due to a high number of missing values (MVs); <sup>2</sup>"Yes" is defined as at least one of the following: fever  $\geq$  38.5 °C for more than three days, arthritis, uveitis, erythema nodosum, pyoderma gangrenosum; <sup>3</sup>excluded due to ambiguous or missing documentation; <sup>4</sup>"Yes" is defined as at least one of the following: rhagade, fissure, indolent/active fistula, abscess, multiple/inflamed tag, abscess, perianal eczema; <sup>5</sup>approx. 3-6 months before clinic visits.

**Supplementary Table S4.** Predictor ranking for histologic inflammation based on the projection-predictive feature selection (PPFS).

| <b>Submodel size</b> | <b>Log FC</b> | <b>Log platelet count</b> | <b>General well-being (category "Reduced, poor, very poor")</b> |
|----------------------|---------------|---------------------------|-----------------------------------------------------------------|
| 1                    | 1             | 0                         | 0                                                               |
| 2                    | 0             | 0.96                      | 0                                                               |
| 3                    | 0             | 0.04                      | 0.68                                                            |

The order of the last 3 column names follows the PPFS's full-data predictor ranking. For each submodel size  $m$  (first column), the values from the last 3 columns give the proportions of cross-validation (CV) folds which have the predictor from the respective column at position  $m$  of their forward search's predictor ranking (there is one forward search per CV fold). Note that the proportions don't need to sum to 1 (neither row-wise nor column-wise) because the forward search was terminated at submodel size 3 (which is less than the number of predictor terms in the reference model). Apart from the patient ID (not shown here), all predictors were standardized (centered and scaled) prior to modeling. Here, "log" is the natural logarithm. Abbreviations: FC, fecal calprotectin.

## SUPPLEMENTARY FIGURES

### Supplementary Figure S1

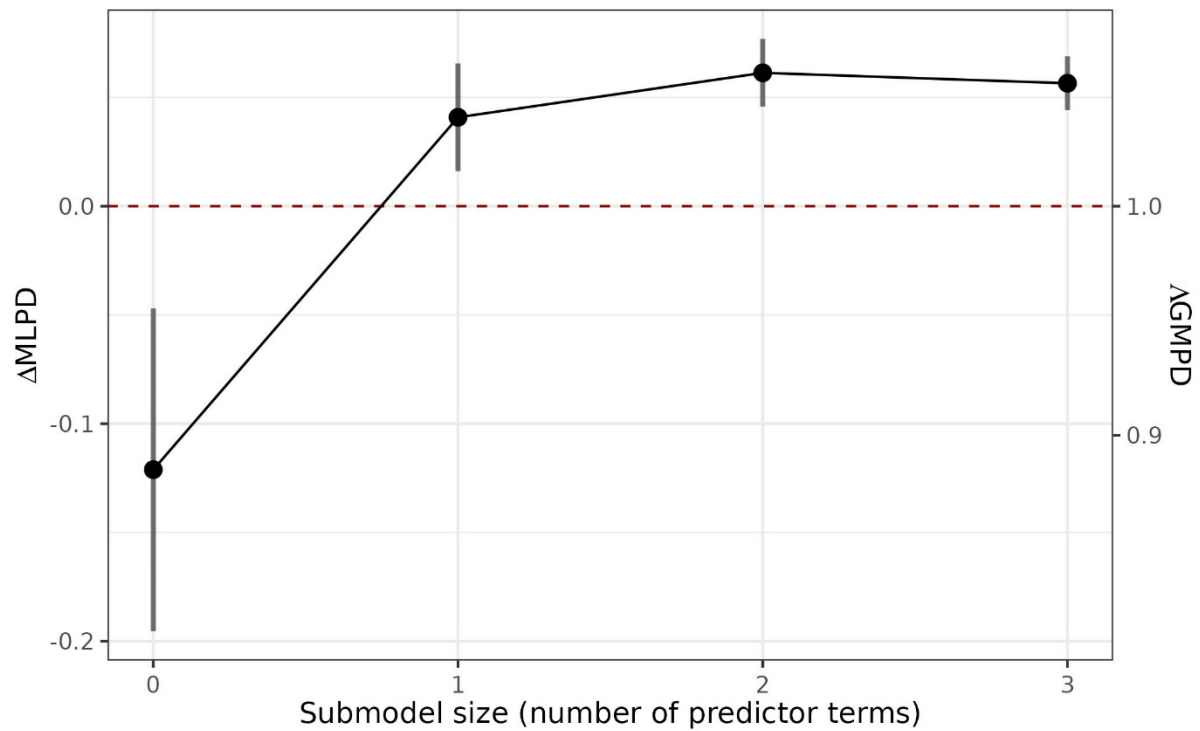

**Model size selection plot from the projection-predictive feature selection (PPFS).** This plot is based on the mean log predictive density (MLPD) as predictive performance measure on the left y-axis which, when exponentiated to the base of the natural logarithm, gives the geometric mean predictive density (GMPD) on the right y-axis. Here, the GMPD is the geometric mean of the predictive probabilities at the observed outcome categories. The higher the MLPD or the GMPD, the better the predictive performance. The x-axis shows the number of predictors during the forward search. The dashed red line indicates the reference model's predictive performance, which is here by definition 0 (on the left y-axis) and 1 (on the right y-axis) since on the left y-axis, the plot visualizes  $\Delta\text{MLPD}$ , defined as the submodel MLPD minus the reference model MLPD (and on the right y-axis, the exponentiation gives  $\Lambda\text{GMPD}$ , the ratio of the submodel GMPD to the reference model GMPD). The uncertainty bars here indicate  $\pm 1$  standard error of the  $\Delta\text{MLPD}$  estimator.

## Supplementary Figure S2

A

### Selected histologic submodel (SHSM)

Disclaimers:

The predictive probabilities are based on 85 observations and are not externally validated. They should not be used for clinical practice.

The predictive probabilities should not be the only means for judging the disease activity. In particular, other causes for elevated FC or platelets values need to be excluded.

Furthermore, the predictive probabilities are based on a dataset where patients were actually referred to endoscopy (so for a new patient for whom an endoscopy is not considered necessary, the predictive probabilities might be biased towards higher—i.e., worse—histologic categories).

Link to this Shiny application:

<https://umrukj.shinyapps.io/shsm/>

Reference:

Schäler B, Wirthgen E, Weber F, Schiller S, Radke M, Claßen M, Dabritz J, CEDATA-GPGE Study Group. Fecal calprotectin and platelet count predict histologic disease activity in pediatric ulcerative colitis: Results from a projection-predictive feature selection. *European Journal of Pediatrics* 2024.

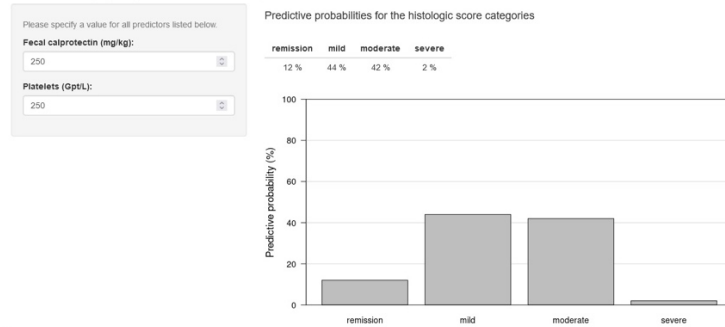

B

### Selected histologic submodel (SHSM)

Disclaimers:

The predictive probabilities are based on 85 observations and are not externally validated. They should not be used for clinical practice.

The predictive probabilities should not be the only means for judging the disease activity. In particular, other causes for elevated FC or platelets values need to be excluded.

Furthermore, the predictive probabilities are based on a dataset where patients were actually referred to endoscopy (so for a new patient for whom an endoscopy is not considered necessary, the predictive probabilities might be biased towards higher—i.e., worse—histologic categories).

Link to this Shiny application:

<https://umrukj.shinyapps.io/shsm/>

Reference:

Schäler B, Wirthgen E, Weber F, Schiller S, Radke M, Claßen M, Dabritz J, CEDATA-GPGE Study Group. Fecal calprotectin and platelet count predict histologic disease activity in pediatric ulcerative colitis: Results from a projection-predictive feature selection. *European Journal of Pediatrics* 2024.

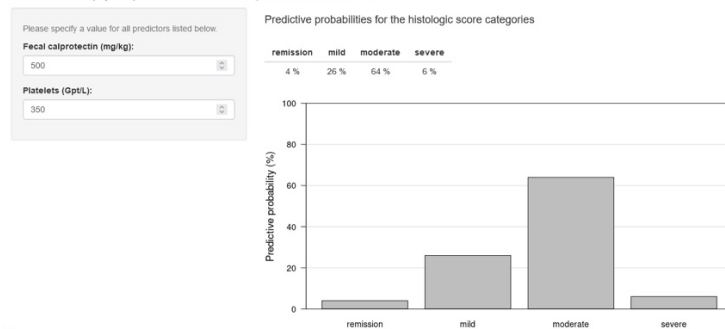

C

### Selected histologic submodel (SHSM)

Disclaimers:

The predictive probabilities are based on 85 observations and are not externally validated. They should not be used for clinical practice.

The predictive probabilities should not be the only means for judging the disease activity. In particular, other causes for elevated FC or platelets values need to be excluded.

Furthermore, the predictive probabilities are based on a dataset where patients were actually referred to endoscopy (so for a new patient for whom an endoscopy is not considered necessary, the predictive probabilities might be biased towards higher—i.e., worse—histologic categories).

Link to this Shiny application:

<https://umrukj.shinyapps.io/shsm/>

Reference:

Schäler B, Wirthgen E, Weber F, Schiller S, Radke M, Claßen M, Dabritz J, CEDATA-GPGE Study Group. Fecal calprotectin and platelet count predict histologic disease activity in pediatric ulcerative colitis: Results from a projection-predictive feature selection. *European Journal of Pediatrics* 2024.

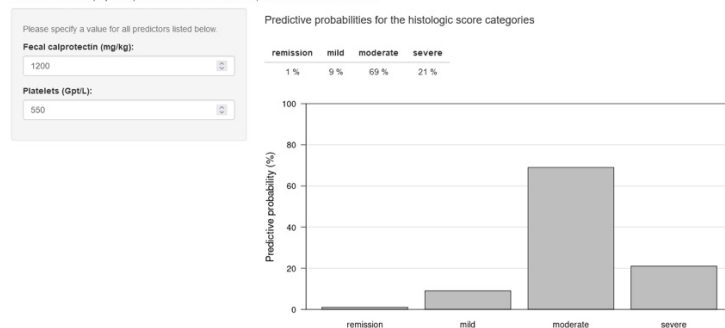

**Screenshot of an example Shiny application.** Predictor input fields are shown on the left-hand side and the returned predictive probabilities of histologic disease activity (based on the selected histologic submodel, SHSM) are shown on the right-hand side. The figure illustrates exemplarily the output for mildly (A), moderately (B) and severely (C) elevated values of FC and platelet count (<https://umrukj.shinyapps.io/shsm/>).



### Supplementary Figure S3

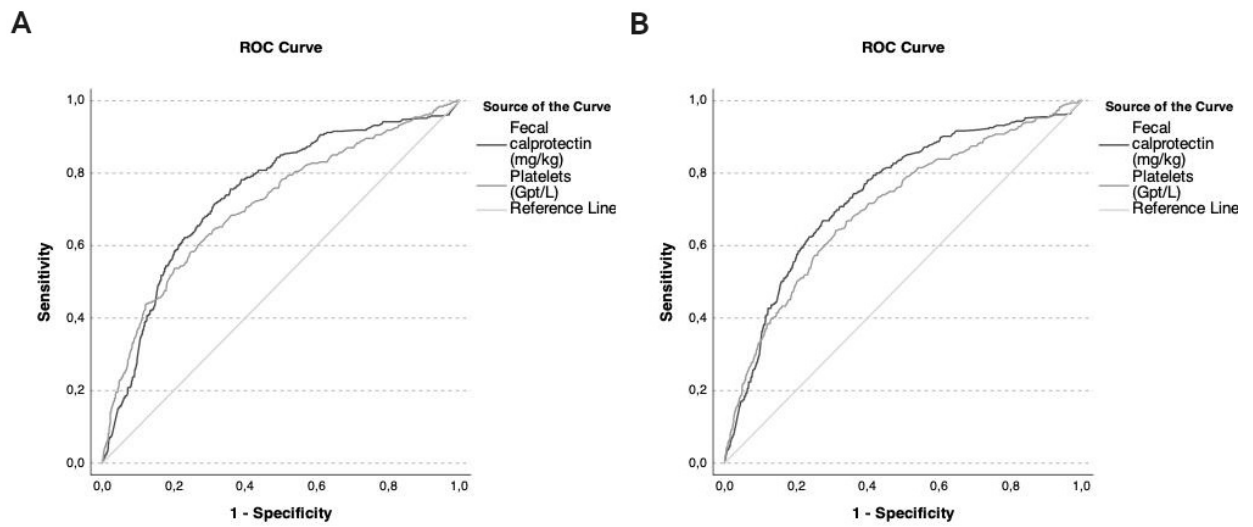

**ROC curve analysis for platelets and fecal calprotectin** to differentiate between mild and moderate and severe disease activity according to PGA (A) and PUCAI (B) using data from the CEDATA-GPGE registry.

## **SUPPLEMENTARY DISCUSSION**

### **Limits of detection**

Even though approved clinical laboratory parameters have a high validity, the statistical value of some laboratory parameters may be limited by analytical conditions such as limits of detection, resulting in so-called right- or left-censored data. In our study, the lower limit of detection for CRP was either 1.0 mg/L or 0.6 mg/L, depending on the study centers where the samples were measured. This resulted in the accumulation of multiple observations at these specific values. While we acknowledge the existence of advanced statistical techniques for handling censored predictors, incorporating such methods was beyond the scope of our investigation. However, these statistical limitations should be considered in future studies.

### **Overfitting in post-selection inference**

The PPFS does not guard its post-selection inference (and hence our SHSM's predictions) against the overfitting induced by the selection of the final submodel size. However, this overfitting should not be severe because in our case, we select the final submodel size from only 4 different submodel sizes (0 to 3), see also Piironen and Vehtari [1] for the theoretical argument.

### **Augmented-data and latent projection**

The augmented-data projection [2] constitutes the exact counterpart to the latent projection (the approximate approach proposed by Catalina et al. [3] employed here). However, for multilevel models as in our case, the augmented-data projection (as well as in some cases also the PPFS's traditional projection) needs further theoretical investigations [2] and hence has not been employed here.

### **Coarsening of categorical predictors**

Originally, some categorical predictors had more than two categories but have been coarsened to two categories here. Where possible (some categorical predictors had to be coarsened due to rare categories), future research should investigate whether using the original (finer) categories would alter our results.

### **Prior sensitivity analysis**

As recommended for Bayesian analyses [4], we conducted a prior sensitivity analysis to check how a different prior distribution (for the reference model) would have altered our results. To this end, we replaced the regularized horseshoe prior for the regression coefficients and brms's default prior for the standard deviation of the patient-specific group-level (or "random") effects by the R2D2M2 prior [5] with hyperparameters that imply more shrinkage than by default. Our results were only slightly affected; in particular, the selected predictors would still have been FC and platelet count. Thus, we consider our chosen prior to be sufficiently robust (in this regard). We

note, however, that we have not altered brms's default prior distribution for the latent thresholds (i.e., for the model's “intercepts”). Details may be found in the source code (see data availability statement).

#### SUPPLEMENTARY REFERENCES

1. Piironen J, Vehtari A (2017) Comparison of Bayesian predictive methods for model selection. *Stat Comput* 27:711–735. doi:10.1007/s11222-016-9649-y
2. Weber F, Glass Ä, Vehtari A (2023) Projection predictive variable selection for discrete response families with finite support. arXiv preprint. Available at: <https://doi.org/10.48550/arXiv.2301.01660>
3. Catalina A, Bürkner PC, Vehtari A (2021) Latent space projection predictive inference. arXiv preprint. Available at: <https://doi.org/10.48550/arXiv.2109.04702>
4. Depaoli S, van de Schoot R (2017) Improving transparency and replication in Bayesian statistics: The WAMBS-Checklist. *Psychol Methods* 22:240–261. <https://doi.org/10.1037/met0000065>
5. Aguilar JE, Bürkner PC (2023) Intuitive joint priors for Bayesian linear multilevel models: The R2D2M2 prior. *Electron J Statist* 17:1711–1767. <https://doi.org/10.1214/23-EJS2136>
